# Supplementary material for: Silver Nanoparticle-Intercalated Cotton Fiber for Catalytic Degradation of Aqueous Organic Dyes for Water Pollution Mitigation
Source: MDPI journal article supplement (doi:10.3390/nano12101621), 2022-05-10
Supplement: s1 [file s1]

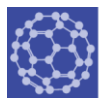

Supplemental Material

# Silver Nanoparticle-Intercalated Cotton Fiber for Catalytic Degradation of Aqueous Organic Dyes for Water Pollution Mitigation

Matthew Blake Hillyer, Jacobs H. Jordan, Sunghyun Nam \*, Michael W. Easson and Brian D. Condon

Cotton Chemistry and Utilization Research Unit, Southern Regional Research Center, Agricultural Research Service, United States Department of Agriculture, New Orleans, LA 70113, USA; matthew.hillyer@usda.gov (M.B.H.); jacob.h.jordan@usda.gov (J.H.J.); michael.easson@usda.gov (M.W.E.); brian.condon@usda.gov (B.D.C.)

\* Correspondence: sunghyun.nam@usda.gov; Tel.: +1-(504)-286-4229

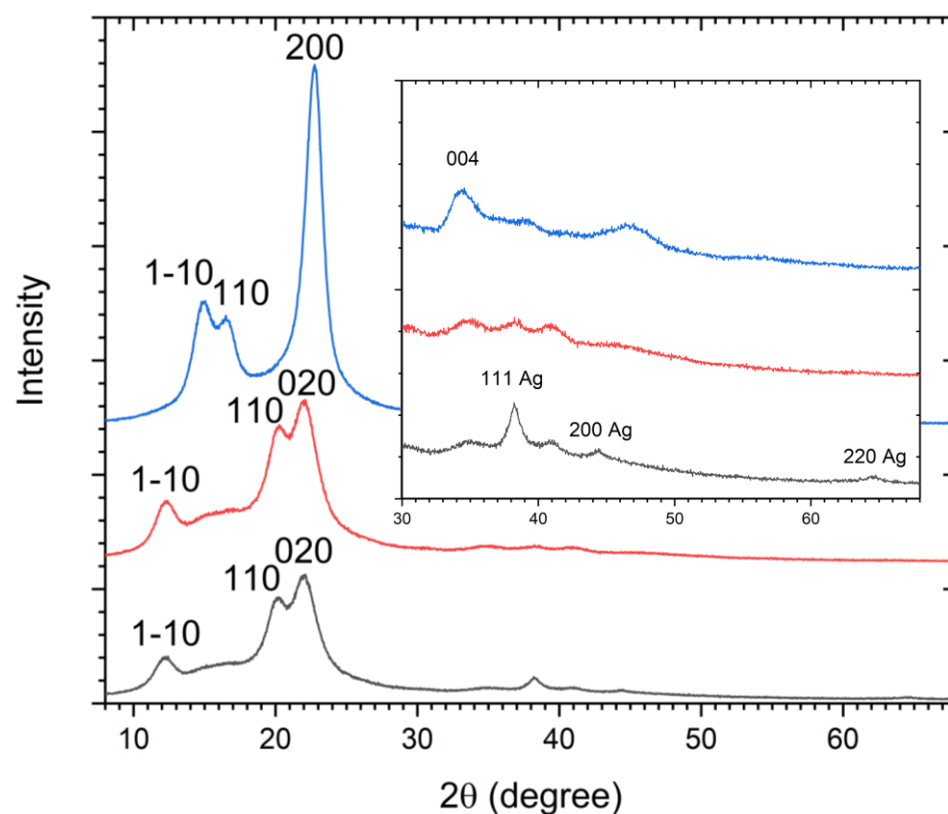

**Figure S1.** XRD spectra of (blue) pristine white cotton, (red) mercerized white cotton, and (black) Ag NP cotton catalyst with (inset) focused view of the spectra between 30 and 68°. Peaks for the cellulose from cotton and Ag NP lattice planes are denoted.

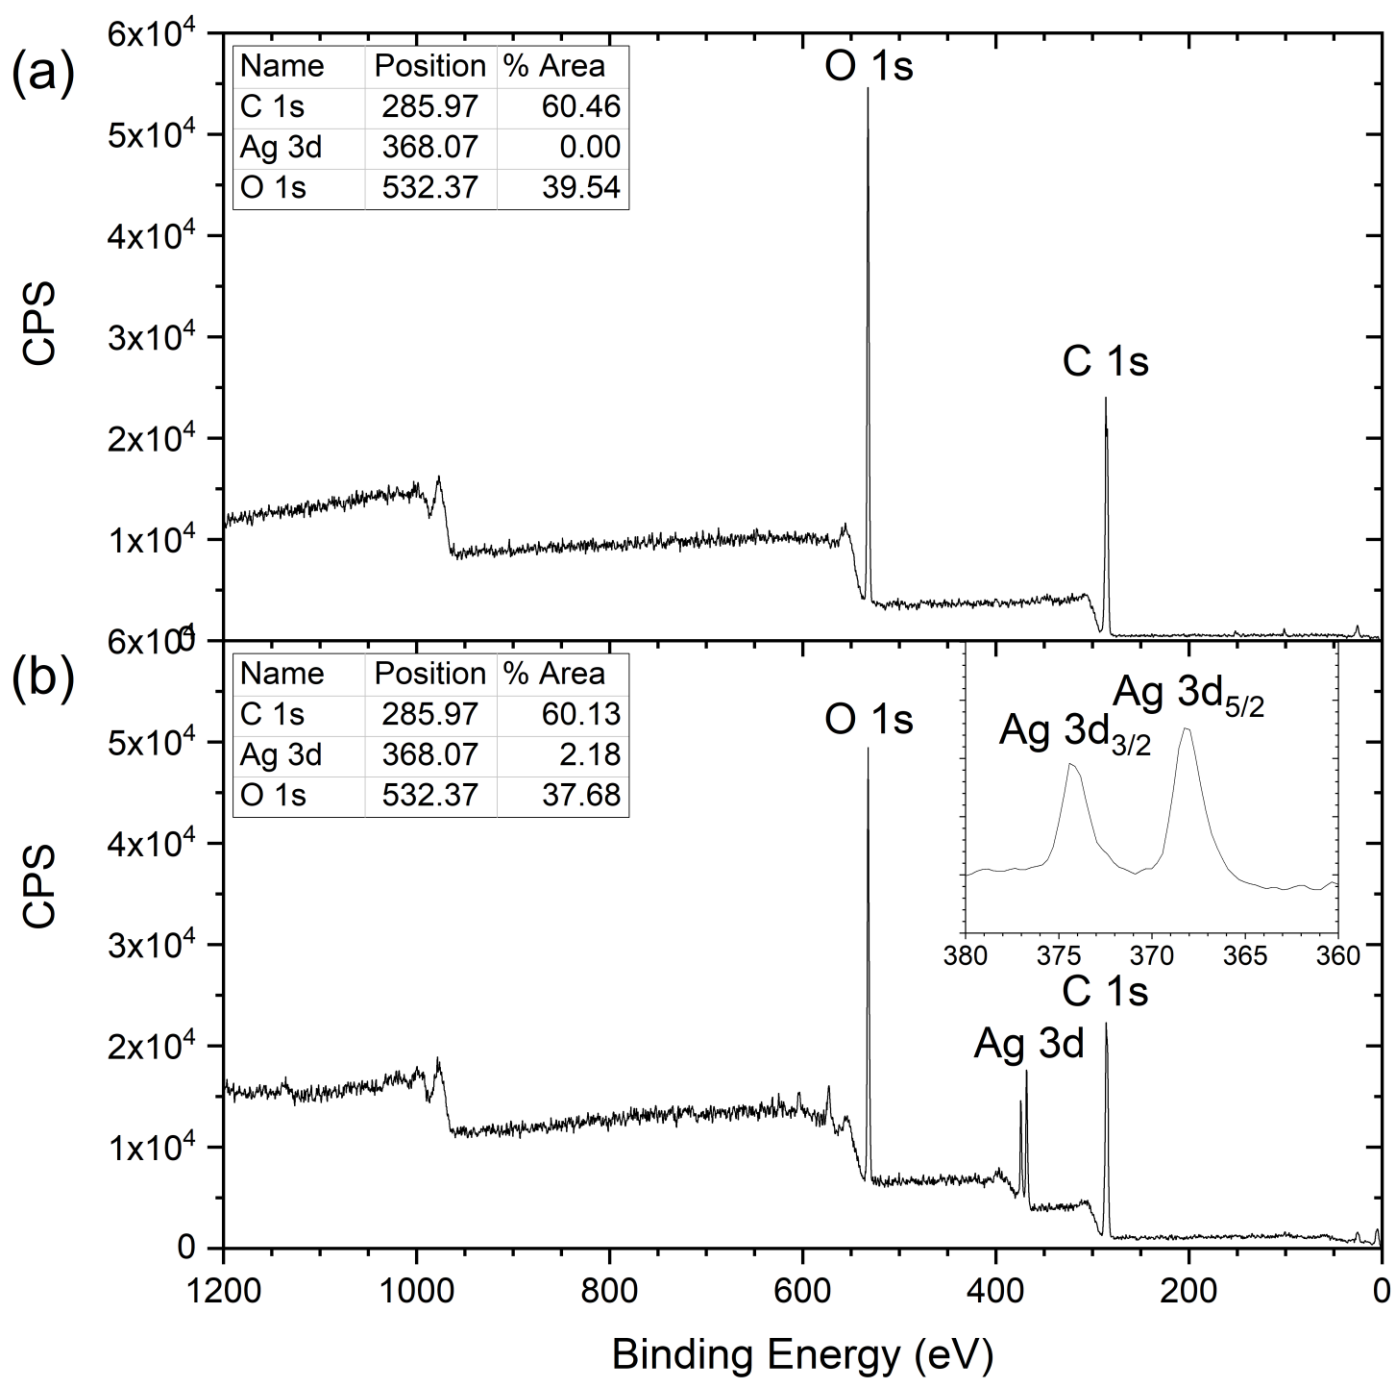

**Figure S2.** XPS spectra of (a) pristine white cotton and (b) Ag NP cotton catalyst with inset of Ag 3d<sub>3/2</sub> and Ag 3d<sub>5/2</sub>.



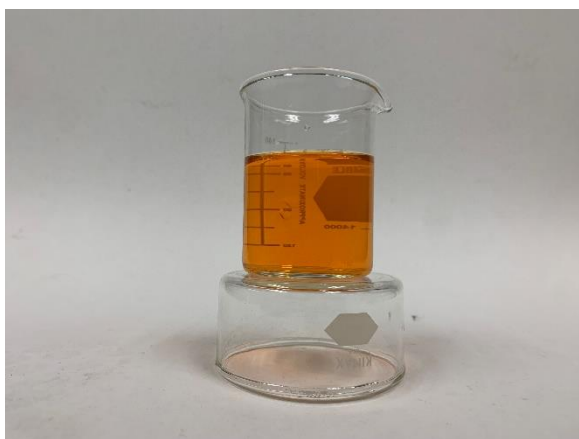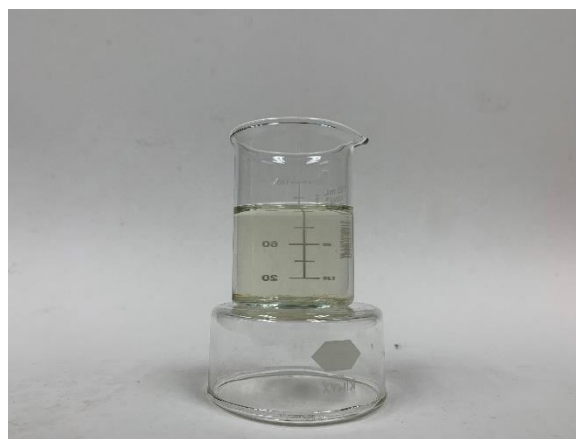

**Figure S5.** Digital images degradation reactions for MO at 25 ppm (left) before reaction and (right) after reaction time.

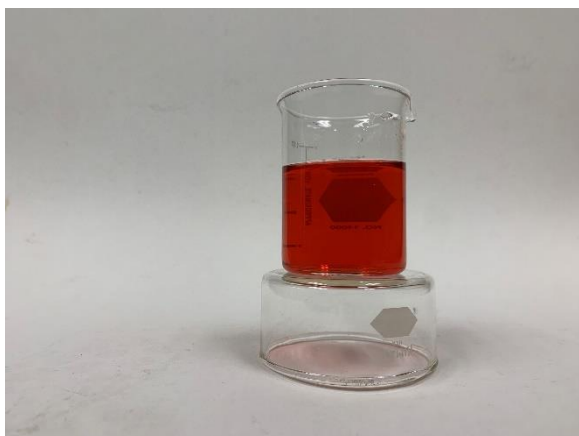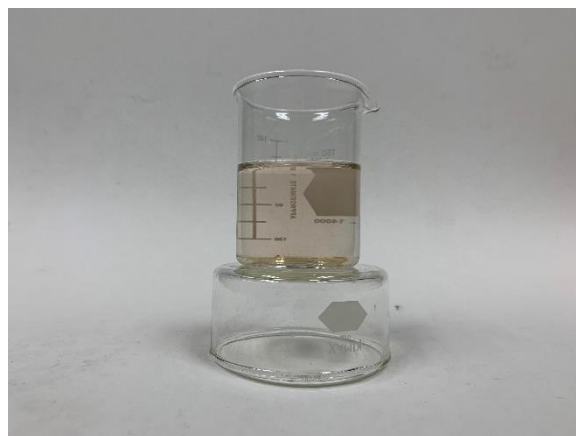

**Figure S6.** Digital images degradation reactions for CR at 25 ppm (left) before reaction and (right) after reaction time.

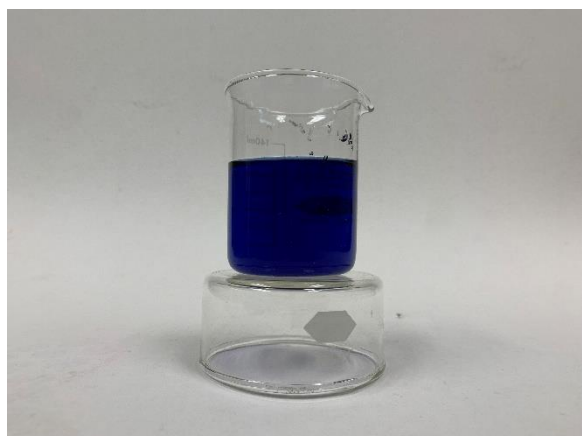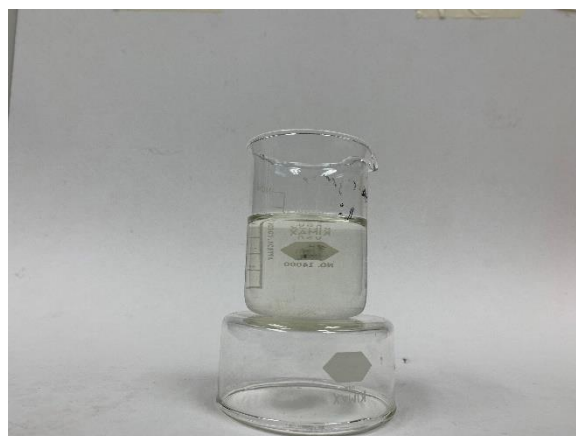

**Figure S7.** Digital images degradation reactions for CSBB at 25 ppm (left) before reaction and (right) after reaction time.

**Table S1.** Comparison of degradation reaction conditions for this study and others similarly performed in the literature.

| [Ag NP]<br>( $\mu\text{g/mL}$ ) | Dye                 | [Dye]<br>(ppm) | [NaBH <sub>4</sub> ]<br>(mM) | Time<br>(min) | Reference  |
|---------------------------------|---------------------|----------------|------------------------------|---------------|------------|
| 26.3                            | Methyl Orange       | 25             | 7.93                         | 90            | This study |
| 26.3                            | Congo Red           | 25             | 7.93                         | 145           |            |
| 26.3                            | Chicago Sky Blue 6B | 25             | 7.93                         | 125           |            |
| 52.6                            | Methyl Orange       | 25             | 7.93                         | 30            |            |
| 52.6                            | Congo Red           | 25             | 7.93                         | 18.5          |            |
| 52.6                            | Chicago Sky Blue 6B | 25             | 7.93                         | 21            |            |
| 100                             | Methyl Orange       | 33             | 100                          | 3             | [1]        |
| 1                               | Methyl Orange       | 16             | 135 *                        | 40            | [2]        |
| 0.108                           | Congo Red           | 7              | 1                            | 50            | [3]        |
| 4                               | Congo Red           | 581            | 83                           | 15            | [4]        |

\* Peroxodisulfate as reductant.

## References

1. Bogireddy, N.K.R.; Kumar, H.A.K.; Mandal, B.K. Biofabricated silver nanoparticles as green catalyst in the degradation of different textile dyes. *J. Environ. Chem. Eng.* **2016**, *4*, 56–64, <https://doi.org/10.1016/j.jece.2015.11.004>.
2. Nagar, N.; Devra, V. A kinetic study on the degradation and biodegradability of silver nanoparticles catalyzed Methyl Orange and textile effluents. *Heliyon* **2019**, *5*, e01356, <https://doi.org/10.1016/j.heliyon.2019.e01356>.
3. Albeladi, S.S.R.; Malik, M.A.; Al-Thabaiti, S.A. Facile biofabrication of silver nanoparticles using *Salvia officinalis* leaf extract and its catalytic activity towards Congo red dye degradation. *J. Mater. Res. Technol.* **2020**, *9*, 10031–10044, <https://doi.org/10.1016/j.jmrt.2020.06.074>.
4. Kolya, H.; Maiti, P.; Pandey, A.; Tripathy, T. Green synthesis of silver nanoparticles with antimicrobial and azo dye (Congo red) degradation properties using *Amaranthus gangeticus* Linn leaf extract. *J. Anal. Sci. Technol.* **2015**, *6*, 33, <https://doi.org/10.1186/s40543-015-0074-1>.
